# Supplementary material
Source: HighWire-hosted journal article supplement (https://erj.ersjournals.com/content/51/2/1702352)
Supplement: inline-supplementary-material-1 [file inline-supplementary-material-1.pdf]

**Supplementary Table S1. Data completeness by country, 2012.**

| <b>WHO region</b> | <b>Country</b>                   | <b>Total population (*000)</b> | <b>Estimated new TB cases</b> | <b>New smear positive reported</b> | <b>Missing data points</b> |
|-------------------|----------------------------------|--------------------------------|-------------------------------|------------------------------------|----------------------------|
| AFR               | Botswana                         | 2048                           | 6848                          | 2782                               | 0                          |
| AFR               | Burundi                          | 9461                           | 6921                          | 4075                               | 0                          |
| AFR               | Cabo Verde                       | 490                            | 420                           | 189                                | 0                          |
| AFR               | Chad                             | 11896                          | 10585                         | 3849                               | 0                          |
| AFR               | Gabon                            | 1542                           | 4929                          | 1745                               | 0                          |
| AFR               | Ghana                            | 24318                          | 14753                         | 7097                               | 0                          |
| AFR               | Guinea-Bissau                    | 1634                           | 1939                          | 1324                               | 0                          |
| AFR               | Kenya                            | 40328                          | 92987                         | 36937                              | 0                          |
| AFR               | Lesotho                          | 2011                           | 10776                         | 3298                               | 0                          |
| AFR               | Liberia                          | 3958                           | 8093                          | 4342                               | 0                          |
| AFR               | Mauritania                       | 3591                           | 2616                          | 1522                               | 0                          |
| AFR               | Mauritius                        | 1248                           | 128                           | 118                                | 0                          |
| AFR               | Namibia                          | 2194                           | 10003                         | 4333                               | 0                          |
| AFR               | Sao Tome and Principe            | 171                            | 115                           | 59                                 | 0                          |
| AFR               | Seychelles                       | 93                             | 20                            | 9                                  | 0                          |
| AFR               | South Africa                     | 51622                          | 323664                        | 119898                             | 0                          |
| AFR               | Swaziland                        | 1193                           | 7165                          | 2548                               | 0                          |
| AFR               | Zambia                           | 13917                          | 40726                         | 12645                              | 0                          |
| AFR               | Zimbabwe                         | 13974                          | 35760                         | 12163                              | 0                          |
| AFR               | Burkina Faso                     | 15632                          | 5210                          | 3583                               | 2                          |
| AFR               | Cote d'Ivoire                    | 20132                          | 23762                         | 14660                              | 2                          |
| AFR               | Democratic Republic of the Congo | 65939                          | 108984                        | 71124                              | 2                          |
| AFR               | Eritrea                          | 4690                           | 3143                          | 779                                | 2                          |
| AFR               | Madagascar                       | 21080                          | 25782                         | 17206                              | 2                          |
| AFR               | Mali                             | 15167                          | 5446                          | 3724                               | 2                          |
| AFR               | Nigeria                          | 159425                         | 92818                         | 52901                              | 2                          |
| AFR               | Rwanda                           | 10294                          | 6091                          | 3571                               | 2                          |
| AFR               | Senegal                          | 12957                          | 12265                         | 8448                               | 2                          |
| AFR               | Sierra Leone                     | 5776                           | 13074                         | 8031                               | 2                          |
| AFR               | South Sudan                      | 10056                          | 8403                          | 3120                               | 2                          |
| AFR               | United Republic of Tanzania      | 45649                          | 62479                         | 25241                              | 2                          |
| AFR               | Angola                           | 21220                          | 51819                         | 21124                              | 3                          |
| AFR               | Congo                            | 4066                           | 11303                         | 3984                               | 3                          |
| AFR               | Algeria                          | 36036                          | 21880                         | 7510                               | 4                          |
| AFR               | Benin                            | 9510                           | 3966                          | 3171                               | 4                          |
| AFR               | Cameroon                         | 20591                          | 24802                         | 15016                              | 4                          |
| AFR               | Central African Republic         | 4445                           | 8084                          | 4641                               | 4                          |
| AFR               | Comoros                          | 699                            | 120                           | 71                                 | 4                          |
| AFR               | Ethiopia                         | 87562                          | 145323                        | 47236                              | 4                          |
| AFR               | Gambia                           | 1693                           | 2333                          | 1429                               | 4                          |
| AFR               | Guinea                           | 11012                          | 11407                         | 6653                               | 4                          |

|     |                                  |        |       |       |   |
|-----|----------------------------------|--------|-------|-------|---|
| AFR | Malawi                           | 14770  | 20335 | 6951  | 4 |
| AFR | Mozambique                       | 24321  | 47741 | 20951 | 4 |
| AFR | Niger                            | 16292  | 10989 | 6848  | 4 |
| AFR | Togo                             | 6391   | 2843  | 2112  | 4 |
| AFR | Uganda                           | 33149  | 44663 | 24916 | 4 |
| AMR | Antigua and Barbuda              | 87     | 3     | 1     | 0 |
| AMR | Argentina                        | 41223  | 8758  | 4661  | 0 |
| AMR | Bahamas                          | 361    | 32    | 21    | 0 |
| AMR | Barbados                         | 280    | 4     | 4     | 0 |
| AMR | Belize                           | 322    | 84    | 36    | 0 |
| AMR | Bolivia                          | 9918   | 8257  | 5568  | 0 |
| AMR | Brazil                           | 198614 | 75122 | 40152 | 0 |
| AMR | Canada                           | 34126  | 1653  | 478   | 0 |
| AMR | Chile                            | 17015  | 2394  | 1173  | 0 |
| AMR | Colombia                         | 45918  | 12097 | 6846  | 0 |
| AMR | Costa Rica                       | 4545   | 475   | 257   | 0 |
| AMR | Cuba                             | 11308  | 734   | 374   | 0 |
| AMR | Curaçao                          | 148    | 1     | 1     | 0 |
| AMR | Ecuador                          | 14935  | 5456  | 3856  | 0 |
| AMR | El Salvador                      | 6038   | 2053  | 1237  | 0 |
| AMR | Guyana                           | 753    | 748   | 309   | 0 |
| AMR | Haiti                            | 10000  | 16571 | 9261  | 0 |
| AMR | Honduras                         | 7504   | 3014  | 1945  | 0 |
| AMR | Jamaica                          | 2741   | 91    | 46    | 0 |
| AMR | Mexico                           | 118618 | 20470 | 13038 | 0 |
| AMR | Panama                           | 3621   | 1520  | 778   | 0 |
| AMR | Paraguay                         | 6210   | 2416  | 1391  | 0 |
| AMR | Puerto Rico                      | 3710   | 71    | 41    | 0 |
| AMR | Saint Lucia                      | 177    | 11    | 11    | 0 |
| AMR | Saint Vincent and the Grenadines | 109    | 30    | 27    | 0 |
| AMR | Suriname                         | 518    | 128   | 83    | 0 |
| AMR | Trinidad and Tobago              | 1328   | 274   | 167   | 0 |
| AMR | United States of America         | 309876 | 9945  | 3563  | 0 |
| AMR | Uruguay                          | 3374   | 808   | 432   | 0 |
| AMR | Venezuela                        | 28996  | 6495  | 3446  | 0 |
| AMR | Dominican Republic               | 9898   | 4262  | 2483  | 2 |
| AMR | Nicaragua                        | 5738   | 2790  | 1484  | 2 |
| AMR | Aruba                            | 102    | 28    | 6     | 4 |
| AMR | Grenada                          | 105    | 1     | 1     | 6 |
| AMR | Guatemala                        | 14732  | 3442  | 2212  | 6 |
| AMR | Peru                             | 29374  | 29760 | 17653 | 6 |
| EMR | Bahrain                          | 1261   | 225   | 101   | 0 |
| EMR | Egypt                            | 82041  | 8453  | 4295  | 0 |
| EMR | Iran                             | 74253  | 11042 | 5409  | 0 |

|     |                          |        |        |        |   |
|-----|--------------------------|--------|--------|--------|---|
| EMR | Iraq                     | 30868  | 8664   | 2760   | 0 |
| EMR | Jordan                   | 6518   | 331    | 85     | 0 |
| EMR | Kuwait                   | 3059   | 737    | 328    | 0 |
| EMR | Lebanon                  | 4337   | 630    | 240    | 0 |
| EMR | Libya                    | 6266   | 1549   | 644    | 0 |
| EMR | Morocco                  | 32108  | 28635  | 11572  | 0 |
| EMR | Oman                     | 2944   | 382    | 205    | 0 |
| EMR | Qatar                    | 1766   | 728    | 180    | 0 |
| EMR | Saudi Arabia             | 28091  | 3690   | 2028   | 0 |
| EMR | Syrian Arab Republic     | 20721  | 3003   | 809    | 0 |
| EMR | Tunisia                  | 10639  | 3239   | 1059   | 0 |
| EMR | United Arab Emirates     | 8329   | 79     | 42     | 0 |
| EMR | West Bank and Gaza Strip | 4069   | 32     | 17     | 0 |
| EMR | Yemen                    | 23592  | 9867   | 3321   | 0 |
| EMR | Pakistan                 | 170044 | 267475 | 110545 | 2 |
| EMR | Somalia                  | 9582   | 11975  | 6127   | 2 |
| EMR | Sudan                    | 36115  | 18775  | 6587   | 2 |
| EMR | Afghanistan              | 27962  | 28679  | 13319  | 3 |
| EMR | Djibouti                 | 831    | 3474   | 1170   | 4 |
| EUR | Albania                  | 2902   | 408    | 185    | 0 |
| EUR | Armenia                  | 2963   | 1213   | 315    | 0 |
| EUR | Austria                  | 8392   | 620    | 95     | 0 |
| EUR | Azerbaijan               | 9100   | 6363   | 1301   | 0 |
| EUR | Belarus                  | 9492   | 4783   | 1277   | 0 |
| EUR | Belgium                  | 10930  | 909    | 235    | 0 |
| EUR | Bosnia and Herzegovina   | 3835   | 1409   | 569    | 0 |
| EUR | Bulgaria                 | 7407   | 2081   | 741    | 0 |
| EUR | Croatia                  | 4316   | 539    | 140    | 0 |
| EUR | Cyprus                   | 1104   | 63     | 15     | 0 |
| EUR | Czech Republic           | 10507  | 565    | 208    | 0 |
| EUR | Denmark                  | 5551   | 342    | 107    | 0 |
| EUR | Estonia                  | 1332   | 259    | 105    | 0 |
| EUR | Finland                  | 5368   | 261    | 78     | 0 |
| EUR | France                   | 62961  | 4705   | 864    | 0 |
| EUR | Georgia                  | 4250   | 3940   | 1648   | 0 |
| EUR | Germany                  | 80435  | 4029   | 952    | 0 |
| EUR | Greece                   | 11178  | 518    | 229    | 0 |
| EUR | Hungary                  | 10015  | 1159   | 273    | 0 |
| EUR | Iceland                  | 318    | 10     | 2      | 0 |
| EUR | Ireland                  | 4617   | 341    | 77     | 0 |
| EUR | Israel                   | 7420   | 506    | 142    | 0 |
| EUR | Italy                    | 59588  | 3096   | 522    | 0 |
| EUR | Kazakhstan               | 16311  | 18006  | 3884   | 0 |
| EUR | Kyrgyzstan               | 5465   | 6195   | 1594   | 0 |
| EUR | Latvia                   | 2091   | 959    | 342    | 0 |

|     |                                       |         |         |        |   |
|-----|---------------------------------------|---------|---------|--------|---|
| EUR | Lithuania                             | 3123    | 1635    | 726    | 0 |
| EUR | Luxembourg                            | 508     | 45      | 0      | 0 |
| EUR | Malta                                 | 412     | 42      | 9      | 0 |
| EUR | Montenegro                            | 622     | 98      | 45     | 0 |
| EUR | Netherlands                           | 16632   | 920     | 163    | 0 |
| EUR | Norway                                | 4891    | 343     | 61     | 0 |
| EUR | Poland                                | 38575   | 7054    | 2433   | 0 |
| EUR | Portugal                              | 10585   | 2490    | 920    | 0 |
| EUR | Republic of Moldova                   | 4084    | 4409    | 1346   | 0 |
| EUR | Romania                               | 20299   | 16107   | 6987   | 0 |
| EUR | Russian Federation                    | 143158  | 105753  | 27467  | 0 |
| EUR | Serbia                                | 9059    | 1872    | 819    | 0 |
| EUR | Slovakia                              | 5407    | 321     | 96     | 0 |
| EUR | Slovenia                              | 2052    | 134     | 47     | 0 |
| EUR | Spain                                 | 46601   | 5677    | 1984   | 0 |
| EUR | Sweden                                | 9382    | 593     | 101    | 0 |
| EUR | Switzerland                           | 7831    | 416     | 87     | 0 |
| EUR | Tajikistan                            | 7582    | 6508    | 2041   | 0 |
| EUR | Macedonia                             | 2062    | 346     | 147    | 0 |
| EUR | Turkey                                | 72310   | 14139   | 4585   | 0 |
| EUR | United Kingdom                        | 62717   | 8269    | 1251   | 0 |
| EUR | Uzbekistan                            | 27740   | 14832   | 4030   | 0 |
| EUR | Turkmenistan                          | 5042    | 2937    | 1147   | 2 |
| EUR | Ukraine                               | 45647   | 40990   | 11030  | 2 |
| SEA | Bangladesh                            | 151617  | 168683  | 106790 | 0 |
| SEA | Bhutan                                | 720     | 1130    | 420    | 0 |
| SEA | Democratic People's Republic of Korea | 24501   | 91885   | 31904  | 0 |
| SEA | Indonesia                             | 241613  | 328824  | 202319 | 0 |
| SEA | Maldives                              | 333     | 110     | 52     | 0 |
| SEA | Sri Lanka                             | 20201   | 9155    | 4269   | 0 |
| SEA | India                                 | 1230985 | 1289836 | 629589 | 2 |
| SEA | Timor-Leste                           | 1057    | 3828    | 1545   | 2 |
| SEA | Myanmar                               | 51733   | 141170  | 42909  | 4 |
| SEA | Nepal                                 | 26876   | 35195   | 15057  | 4 |
| SEA | Thailand                              | 66692   | 60304   | 30998  | 4 |
| WPR | Australia                             | 22163   | 1305    | 290    | 0 |
| WPR | Brunei Darussalam                     | 393     | 243     | 119    | 0 |
| WPR | China                                 | 1340969 | 890645  | 316332 | 0 |
| WPR | China, Hong Kong SAR                  | 6994    | 4809    | 1463   | 0 |
| WPR | China, Macao SAR                      | 535     | 404     | 156    | 0 |
| WPR | Fiji                                  | 860     | 210     | 111    | 0 |
| WPR | French Polynesia                      | 268     | 50      | 26     | 0 |
| WPR | Guam                                  | 159     | 68      | 23     | 0 |
| WPR | Japan                                 | 127320  | 20857   | 7663   | 0 |

|     |                                  |       |        |       |   |
|-----|----------------------------------|-------|--------|-------|---|
| WPR | Kiribati                         | 103   | 346    | 134   | 0 |
| WPR | Lao People's Democratic Republic | 6261  | 4118   | 3062  | 0 |
| WPR | Malaysia                         | 28120 | 21851  | 13311 | 0 |
| WPR | Micronesia (Federated States of) | 104   | 144    | 43    | 0 |
| WPR | Mongolia                         | 2713  | 4128   | 1716  | 0 |
| WPR | New Zealand                      | 4369  | 293    | 68    | 0 |
| WPR | Republic of Korea                | 49090 | 43702  | 12137 | 0 |
| WPR | Samoa                            | 186   | 22     | 15    | 0 |
| WPR | Singapore                        | 5079  | 2301   | 678   | 0 |
| WPR | Solomon Islands                  | 526   | 361    | 157   | 0 |
| WPR | Tonga                            | 104   | 11     | 9     | 0 |
| WPR | Vanuatu                          | 236   | 125    | 51    | 0 |
| WPR | Papua New Guinea                 | 6848  | 20557  | 2862  | 2 |
| WPR | Cambodia                         | 14364 | 40185  | 14838 | 4 |
| WPR | Philippines                      | 93039 | 216627 | 94006 | 4 |
| WPR | Viet Nam                         | 88358 | 102112 | 51033 | 4 |
| WPR | New Caledonia                    | 246   | 38     | 13    | 6 |

WHO regions: AFR, African Region; AMR, American Region; EMR Eastern Mediterranean Region; EUR, European Region; SEA, South East Asian Region; WPR, Western Pacific Region.

**Supplementary table S2. Notifications and proportions of notifications pertaining to adolescents in the supplementary data**

| Country      | Notifications 0-14 | Proportion 10-14 | Notifications 15-24 | Proportion 15-19 |
|--------------|--------------------|------------------|---------------------|------------------|
| Brazil       | 2,595              | .426             | 12,663              | .347             |
| Estonia      | 1,396              | .190             | 1,974               | .298             |
| Indonesia    | 23,918             | .206             | 44,945              | .376             |
| Romania      | 2,316              | .345             | 8,082               | .355             |
| South Africa | 79,902             | .107             | 61,162              | .305             |
